# Supplementary material for: Monolayer/spheroid co-culture of cells on a PDMS well plate mediated by selective polydopamine coating
Source: Royal Society of Chemistry journal article supplement (doi:10.1039/d0tb01589j), 2020-01-01
Supplement: d0tb01589j1.pdf [file d0tb01589j1.pdf]

## **Supporting Information**

# Monolayer/spheroid co-culture of cells on PDMS well plate mediated by selective polydopamine coating

Woo Ri Chae<sup>a</sup> and Nae Yoon Lee<sup>\*a</sup>

<sup>a</sup> Department of BioNano Technology, Gachon University, 1342 Seongnam-daero, Sujeong-gu,  
Seongnam-si, Gyeonggi-do, 13120, Korea.

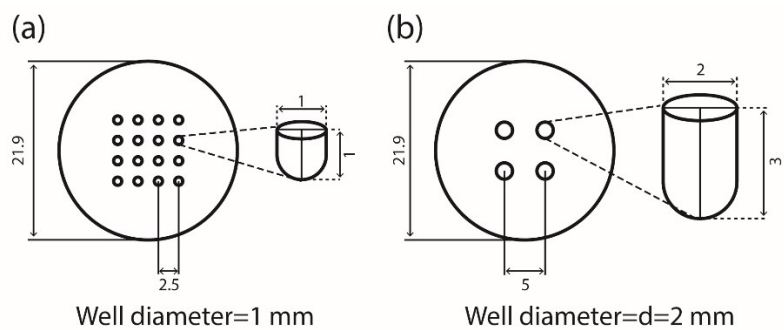

**Figure S1.** Schematic drawings of PDMS well plates with (a)  $d=1$  mm and (b)  $d=2$  mm of well diameters. The well plates are fitted into a commercial 12 well plate.

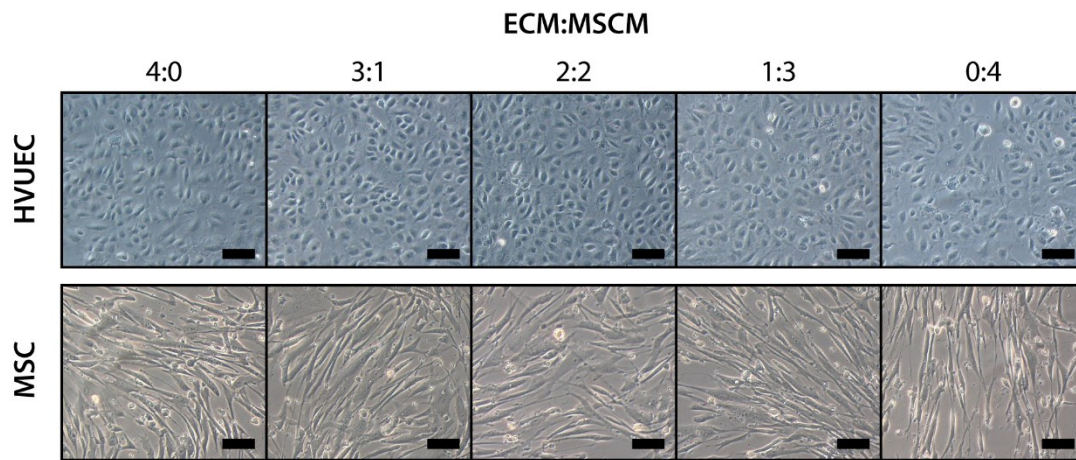

**Figure S2.** Proliferation of HUVEC and MSC in different ratios of ECM and MSCM at day 3 of culture. scale bar=100  $\mu$ m.

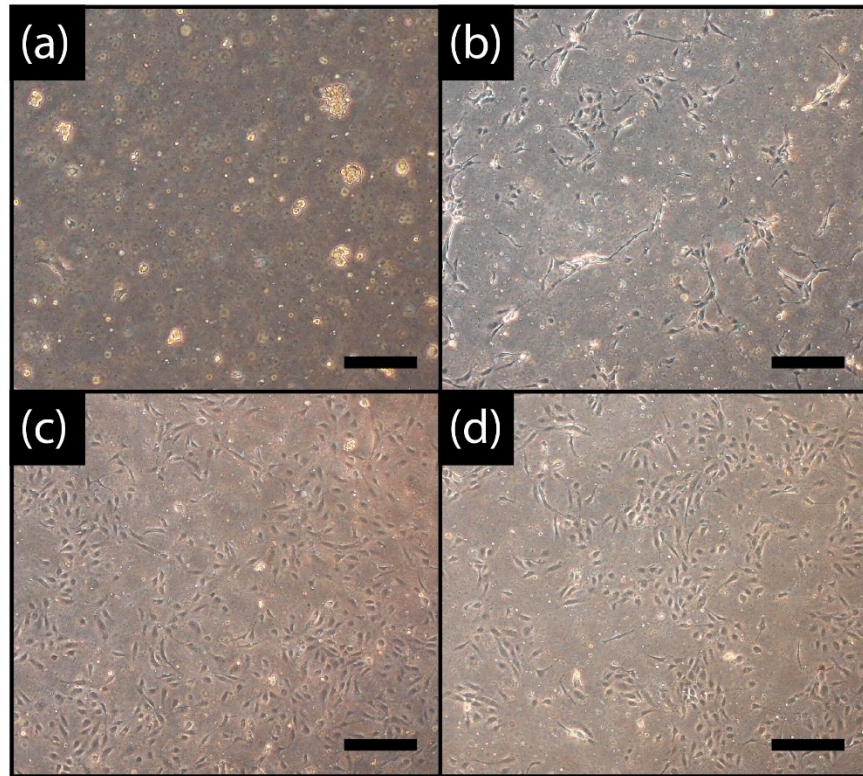

**Figure S3.** HUVEC attachment observed at 24 h after the seeding as a function of PDA coating time. The results of seeding  $10^4$  cells/cm<sup>2</sup> HUVECs after (a) 0 h, (b) 1 h, (c) 2 h and (d) 3 h of PDA coating. Scale bar=300  $\mu$ m.
